# Supplementary material for: The molecular dynamics of subdistal appendages in multi-ciliated cells
Source: PubMed Central journal article supplement (PMC7840914; doi:10.1038/s41467-021-20902-4), 2021-01-27
Supplement: 41467_2021_20902_MOESM1_ESM.pdf [file 41467_2021_20902_MOESM1_ESM.pdf]

# Supplementary Information

## The molecular dynamics of subdistal appendages in multi-ciliated cells

Ryu et al. Supplementary Information includes Supplementary Method, Supplementary Table and seven Supplementary Figures with legends

## Supplementary methods

**Analysis of translational polarity.** For translational polarity analysis, we used Fiji software to draw vectors from the centers of apical surfaces of each cell to the centers of BB patches or to the cell perimeters in the same direction of BB patch vector. BB patch displacement was analyzed by dividing the magnitude of BB patch vector by the length of the line drawn from the center of the cell surface to the cell perimeter. For tissue-wide translational polarity analysis, the angles of each BB patch vector were obtained from approximately 8 cells in the high power field ( $64.31 \times 64.31 \mu\text{m}^2$ ), averaged for the area, normalized to  $225^\circ$  and then their distribution was plotted on a histogram.

**Real-time quantitative RT-PCR analysis.** Total RNAs from dissected LWs was isolated using TRIzol reagent (Invitrogen, 15596-026). cDNA was synthesized using up to 4  $\mu\text{g}$  of total RNA and the QIAGEN OneStep RT-PCR Kit (QIAGEN, 210210) in 80  $\mu\text{l}$  1X QIAGEN OneStep RT-PCR buffer containing 400  $\mu\text{M}$  of each dNTP, 0.5  $\mu\text{M}$  oligodT, 5 units of RNase inhibitor, and 1  $\mu\text{l}$  Omniscript Reverse Transcriptase. Gene expression was detected by real-time quantitative RT-PCR in a LightCycler 96 Instrument (Roche, 05815916001) using qPCRBIO SyGreen Blue Mix (PCR Biosystems, PB20.15-05). The PCR amplification primers for *KI67*, *FOXJ1*, *GEMC1*, *MCIDAS*, *DEUP1*, *CEP152*, *VANGL1*, *VANGL2*, *FZD3*, *CELSR1*, *CELSR2*, *CELSR3*, *ANKS1A*, *ANKS1B*, and *GAPDH* mouse genes are described in the supplementary table. mRNA expression levels were normalized to *GAPDH* mRNA expression.

**Magnetic resonance microimaging.** Mice were anesthetized with a mixture of air and 3% isoflurane (Hana Pharm. Co., Ltd., Kyonggi-Do, Korea) and then placed in a MRI-compatible animal cradle. The isoflurane concentration was maintained at  $1.5 \pm 0.5\%$ , adjusted to maintain the animal at  $100 \pm 20$  breaths/min throughout the MRI sessions. Respiratory signals and body temperature were monitored using a physiological monitoring system (SA Instruments, Inc., Stony Brook, NY, USA). Body temperature was maintained by circulating water through heating pads. MRI was conducted using a 9.4 T horizontal-bore Bruker Avance III HD imaging system (Bruker Biospin, Ettlingen, Germany) and a 23-mm diameter transmit/receive volume radio frequency (RF) coil (Bruker Biospin, Ettlingen, Germany). An axial T2 weighted turbo rapid acquisition with relaxation enhancement (RARE) image (T2 WI: repetition time [TR] = 4300 ms, echo time [TE] = 26 ms, number of averages [NA] = 5, field of view [FOV] = 20 mm x 20 mm, matrix size = 256 x 256, slice thickness = 250  $\mu\text{m}$ , number of slices = 5, RARE factor = 8, and acquisition time = 11 min 28 sec) was acquired around the brain. 3D-projection image reconstruction and ventricle volume measurement were processed by Fiji software. Twenty consecutive coronal images were merged into a single picture for each brain. Ventricles appeared bright on T2-weighted  $\mu\text{MRI}$  mouse brain images are shown in gray scale and color LUT (Look Up Table) display. Color-coded images display brain ventricles with anterior-posterior (A-P) direction. Red colors represent an anterior region of the brain ventricle, while blue colors represent a posterior region.

## Supplementary table

| Primary antibodies   | Name                            | Isotype       | Reference |                  | Usage         |             |
|----------------------|---------------------------------|---------------|-----------|------------------|---------------|-------------|
|                      | ZO-1-488                        | Mouse         | IgG1      | Invitrogen       | 339188        | IHC         |
|                      | $\alpha$ -Tubulin               | Mouse         | IgG2a     | Santa Cruz       | SC5286        | IHC         |
|                      | GT335                           | Mouse         | IgG1      | Adipogen         | AG-20B-0020   | IHC         |
|                      | Ac-Tubulin                      | Mouse         | IgG2b     | Sigma-aldrich    | T7451         | IHC         |
|                      | $\gamma$ -Tubulin               | Mouse         | IgG1      | Abcam            | ab11316       | IHC         |
|                      | CEP164                          | Rabbit        | IgG       | Atlas antibodies | HPA037606     | IHC         |
|                      | CEP19                           | Rabbit        | IgG       | Proteintech      | 26036-1-AP    | IHC, WB, IP |
|                      | CEP350                          | Rabbit        | IgG       | Novus            | NB100-59811   | WB, IP      |
|                      | ODF2                            | Rabbit        | IgG       | Atlas antibodies | HPA001874     | IHC         |
|                      | CNTRL                           | Mouse         | IgG1      | Santa cruz       | SC-365521     | IHC         |
|                      | FOP                             | Mouse         | IgG2b     | Abnova           | H00011116-M01 | IHC, WB, IP |
|                      | Centrin                         | Mouse         | IgG2a     | Millipore        | 04-1624       | IHC         |
|                      | Frizzled3                       | Mouse         | IgG2a     | Sigma-aldrich    | WH0007976M9   | IHC         |
|                      | Vangl1                          | Rabbit        | IgG       | Atlas antibodies | HPA025235     | IHC         |
|                      | ANKS1A                          | Rabbit        | IgG       | Bethyl           | A303-049A     | IHC         |
|                      | ANKS1A                          | Rabbit        | IgG       | Bethyl           | A303-050A     | WB, IP      |
| GFP                  | Chick                           | IgY           | Abcam     | ab13970          | IHC           |             |
| Secondary antibodies | Name                            | Reference     |           | Dilution         |               |             |
|                      | Goat anti-mouse IgG1 Alexa 488  | Invitrogen    | A21121    | 1/800            |               |             |
|                      | Goat anti-mouse IgG2b Alexa488  | Invitrogen    | A21141    | 1/800            |               |             |
|                      | Goat anti-mouse IgG1 Alexa568   | Invitrogen    | A21124    | 1/800            |               |             |
|                      | Goat anti-mouse IgG2a Alexa568  | Invitrogen    | A21134    | 1/800            |               |             |
|                      | Goat anti-mouse IgG2b Alexa568  | Invitrogen    | A21144    | 1/800            |               |             |
|                      | Donkey anti-rabbit IgG Alexa488 | Invitrogen    | A21206    | 1/800            |               |             |
|                      | Goat anti-rabbit IgG Alexa568   | Invitrogen    | A11036    | 1/800            |               |             |
|                      | Goat anti-rabbit IgG Alexa647   | Invitrogen    | A21244    | 1/800            |               |             |
|                      | Goat anti-chick IgY Alexa647    | Invitrogen    | A32933    | 1/800            |               |             |
|                      | Goat anti-Mouse IgG (H+L) HRP   | Sigma-aldrich | A4416     | 1/1000           |               |             |
|                      | Goat anti-Rabbit IgG (H+L) HRP  | Invitrogen    | G-21234   | 1/1000           |               |             |

## Supplementary table 1.



|                               | Name             |                                  | Sequence (5' → 3')        | Size                 |
|-------------------------------|------------------|----------------------------------|---------------------------|----------------------|
|                               | Oligonucleotides | <i>ANKS1A</i><br>conventional KO | Forward 1                 | TGAAGGCACATGAGGCTGAG |
| Reverse                       |                  |                                  | ACAGCGTTTGCATCTTGCTG      | 20 mer               |
| Forward 2                     |                  |                                  | ATGTCATAGCTGTTTCCTGT      | 20 mer               |
| <i>ANKS1A</i><br>inducible KO |                  | Forward                          | GATTCCTGGAAGCCCGAGAAGAACT | 25 mer               |
|                               |                  | Reverse                          | TTGAACTCACAGAGCTGTCTGCCTG | 25 mer               |
| YFP                           |                  | Forward                          | GGGAGGGGAGTGTGCAATACCTTT  | 25 mer               |
|                               |                  | Reverse                          | AAGACCGCGAAGAGTTTGTC      | 20 mer               |
| <i>ANKS1A-CreER</i>           |                  | Forward                          | TGGATAGTGAAACAGGGGCAATGGT | 25 mer               |
|                               |                  | Reverse                          | TCTCCACCATGCCCTCTACACATTT | 25 mer               |
| Morpholino                    |                  | <i>xanks1a</i> -MO               | AATAACTCCTGTTCTTTCCCATCC  | 25 mer               |
| <i>Kl67</i>                   |                  | Forward                          | CCTGCCCGACCCTACAAAAT      | 20 mer               |
|                               |                  | Reverse                          | TGCTGCTTCTCCTTCACTGG      | 20 mer               |
| <i>FOXJ1</i>                  |                  | Forward                          | GACGTGGACTATGCCACCAA      | 20 mer               |
|                               |                  | Reverse                          | ATGGAATTCTGCCAGGTGGG      | 20 mer               |
| <i>GEMC1</i>                  |                  | Forward                          | ACCTCTCATCCCAGAGCAGT      | 20 mer               |
|                               |                  | Reverse                          | TGAGCCATGTGTTCCCTGAC      | 20 mer               |
| <i>MCIDAS</i>                 |                  | Forward                          | CTCCCCTGACCAACAGTGAC      | 20 mer               |
|                               |                  | Reverse                          | TCTTTCAGCTGCACGTTCT       | 20 mer               |
| <i>DEUP1</i>                  |                  | Forward                          | ATATCCTTCGGGCTTCCCT       | 20 mer               |
|                               |                  | Reverse                          | GGTGTGTCTCTGCAGCTCAT      | 20 mer               |
| <i>CEP152</i>                 |                  | Forward                          | GAAGGACCACGTGCAACAAC      | 20 mer               |
|                               |                  | Reverse                          | TCCTGCACAGAGCCTGATTG      | 20 mer               |
| <i>VANGL1</i>                 |                  | Forward                          | CTCACCCCATTCCTTCAT        | 20 mer               |
|                               |                  | Reverse                          | TGCTTGC GGAAGAAAAGTGC     | 20 mer               |
| <i>VANGL2</i>                 |                  | Forward                          | AAGCTGCTCATCCTGCTGTT      | 20 mer               |
|                               |                  | Reverse                          | AAGATGCGCACACCGTAGAA      | 20 mer               |
| <i>FZD3</i>                   |                  | Forward                          | GAATCAGGTCTGGACGACTCA     | 21 mer               |
|                               |                  | Reverse                          | CATCTGGGAGACAACATGGA      | 20 mer               |
| <i>CELSR1</i>                 |                  | Forward                          | TCTCAGAGGAACCTTCTGCGATG   | 22 mer               |
|                               |                  | Reverse                          | CAGGTACCAAGGCACAGAGATG    | 22 mer               |
| <i>CELSR2</i>                 |                  | Forward                          | CCAGTGGCCTTTGCTGTTTC      | 20 mer               |
|                               | Reverse          | TTGACAGAGAGCAGTGCCAG             | 20 mer                    |                      |
| <i>CELSR3</i>                 | Forward          | GGTCAGGGTCCAGGGTATCT             | 20 mer                    |                      |
|                               | Reverse          | TCCACTCTTTTGC GGATGCT            | 20 mer                    |                      |
| <i>ANKS1A</i>                 | Forward          | CAGGCATTTGAGGTGGCCTA             | 20 mer                    |                      |
|                               | Reverse          | GGCACTGCAGACTTCCTCAT             | 20 mer                    |                      |
| <i>ANKS1B</i>                 | Forward          | AAAGGGGAGTGCTCTTCACG             | 20 mer                    |                      |
|                               | Reverse          | CTTCCTGCGCCTTCCAAGTA             | 20 mer                    |                      |
| <i>GAPDH</i>                  | Forward          | AGGTCGGTGTGAACGGATTTG            | 21 mer                    |                      |
|                               | Reverse          | TGTAGACCATGTAGTTGAGGTCA          | 23 mer                    |                      |
| <i>anks1a</i>                 | Forward          | GTCAGATCTCGTCACACTGC             | 20 mer                    |                      |
|                               | Reverse          | AGACTTGGACAGACTCCTGC             | 20 mer                    |                      |
| <i>odc1</i>                   | Forward          | CCCTATAAGACAAGGAATAC             | 20 mer                    |                      |
|                               | Reverse          | TCCATTCCGCTCTCCTGAGCAC           | 22 mer                    |                      |

Supplementary table 2.

| Softwares | Name                  | Reference                                       |
|-----------|-----------------------|-------------------------------------------------|
|           | Fiji (1.52p)          | <a href="https://fiji.sc/">https://fiji.sc/</a> |
|           | SigmaPlot (7.0)       | Systat Software Inc.                            |
|           | Prism Graphpad (5.01) | GraphPad software                               |
|           | ZEN blue (1.1.2.0)    | Carl Zeiss Microscopy                           |
|           | ZEN black (8.1)       | Carl Zeiss Microscopy                           |
|           | Photoshop (7.0.1)     | Adobe                                           |
|           | Premiere Pro 2019     | Adobe                                           |

**Supplementary table 3.**

Supplementary figures

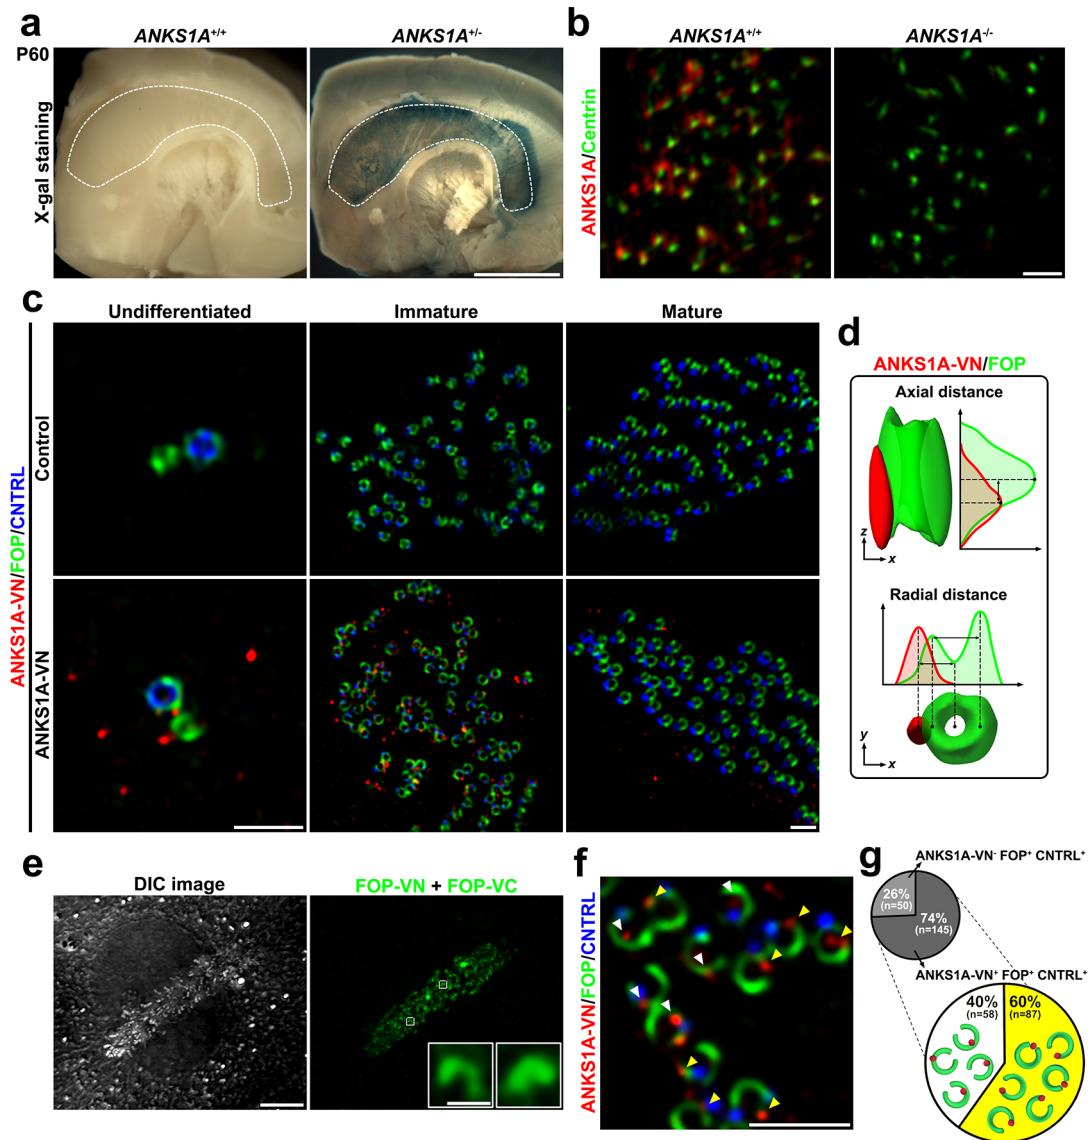

**Supplementary Figure 1.** (a) LWs (marked by dotted lines) with other forebrain tissues were subjected to X-gal staining. Scale bar, 500  $\mu$ m. (b) Primary E1 cells were cultured for 8 days after serum starvation; centrin, a BB marker. Scale var, 1  $\mu$ m. (c) 3DSIM micrographs of E1 cell BBs representing three different developmental stages. The LWs at P4 (undifferentiated and immature) or P21 (mature) were co-stained with FOP, CNTRL, and GFP antibodies. In immature cells, most of centrioles were localized to the apical surface but those apically docked BBs displayed a random orientation of the FOP-negative regions. In contrast, in mature cells, almost all of apically docked BBs display a uniform alignment of the FOP-negative regions. Scale bars, 1  $\mu$ m. (d) Linear 3D SIM measurement analysis. FOP was used as a reference in each experiment for both axial and radial distances of other BB proteins. (e) Bimolecular fluorescent complementation analysis. The N-terminal (VN) and C-terminal (VC) portions of GFP were fused with the C-terminus of FOP, respectively. These constructs were transfected into primary E1 progenitors and then the differentiated cells with multi-cilia (as shown in DIC image) were further analyzed by Confocal microscopy. Scale bar, 5  $\mu$ m (left) and 500 nm (right). (f and g) The co-localization of ANKS1A puncta in SDAs (shown in Fig. 1k) is illustrated in an enlarged picture (f) with a diagram showing their distribution (g). Scale bar, 1  $\mu$ m. The yellow arrowheads mark the ANKS1A puncta in regions of reduced FOP staining whereas the white arrowheads point to the ANKS1A puncta in FOP-stained regions. N indicates the number of BBs.

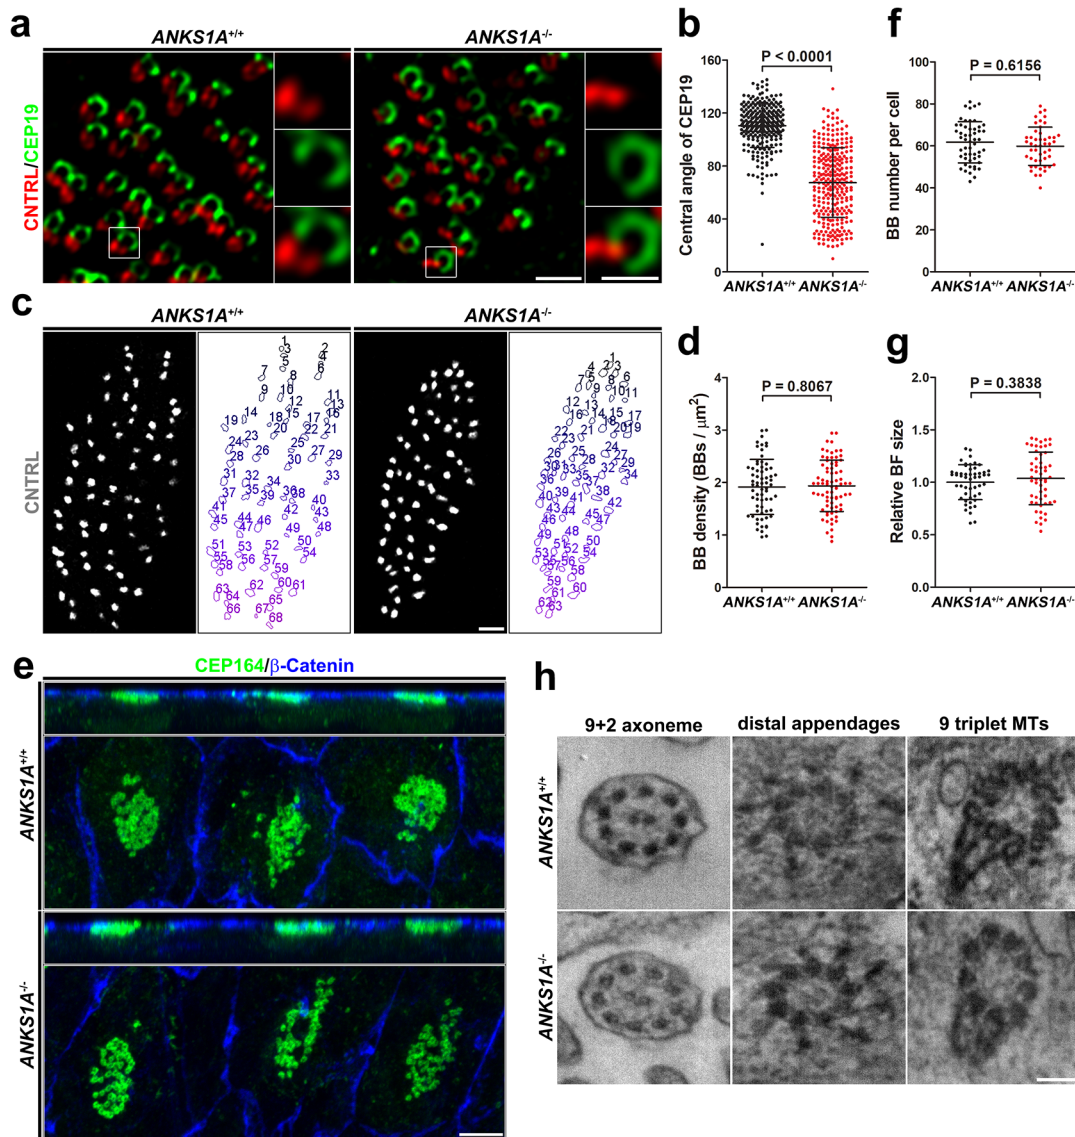

**Supplementary Figure 2.** (a) Experiments were performed as described in Fig. 2c, except that CEP19 was used instead of FOP. (b) The data in panel a were quantified. The data represent means  $\pm$  SD. Each point on the graph represents a central angle of a CEP19-negative region. *ANKS1A*<sup>+/+</sup> set,  $n = 254$  BBs; *ANKS1A*<sup>-/-</sup>,  $n = 285$  BBs. (c and d) 3D object count maps were generated with the three-dimensional object counter plugin in the Fiji software package. Each outline indicates a CNTRL-positive focus that can be used for assessing the number of BBs but also the BB density in a single cell. Scale bar for a and c, 1  $\mu$ m. (e and f) Both apical surface docking of BBs and their number in each cell were analyzed using CEP164 staining. Note that the BB density based on CEP164 staining was not significantly different between WT and KO samples (data not shown). Scale bar, 5  $\mu$ m. (g) The data represent means  $\pm$  SD. Each point on the graph represents the overall size of a BF based on a serial TEM analysis as shown in Fig 2h. *ANKS1A*<sup>+/+</sup> set,  $n = 51$  BBs; *ANKS1A*<sup>-/-</sup>,  $n = 54$  BBs. (h) Thin section images of ciliary axoneme, distal appendages, and nine triplet microtubules (MTs) in the LWs for young WT and KO mice at P45. Note that we scrutinized approximately 100 basal bodies from WT or KO samples, indicating that the 9+2 ciliary MT structure, distal appendage and triplet MT structure were not disturbed in KO. Scale bar, 100 nm.

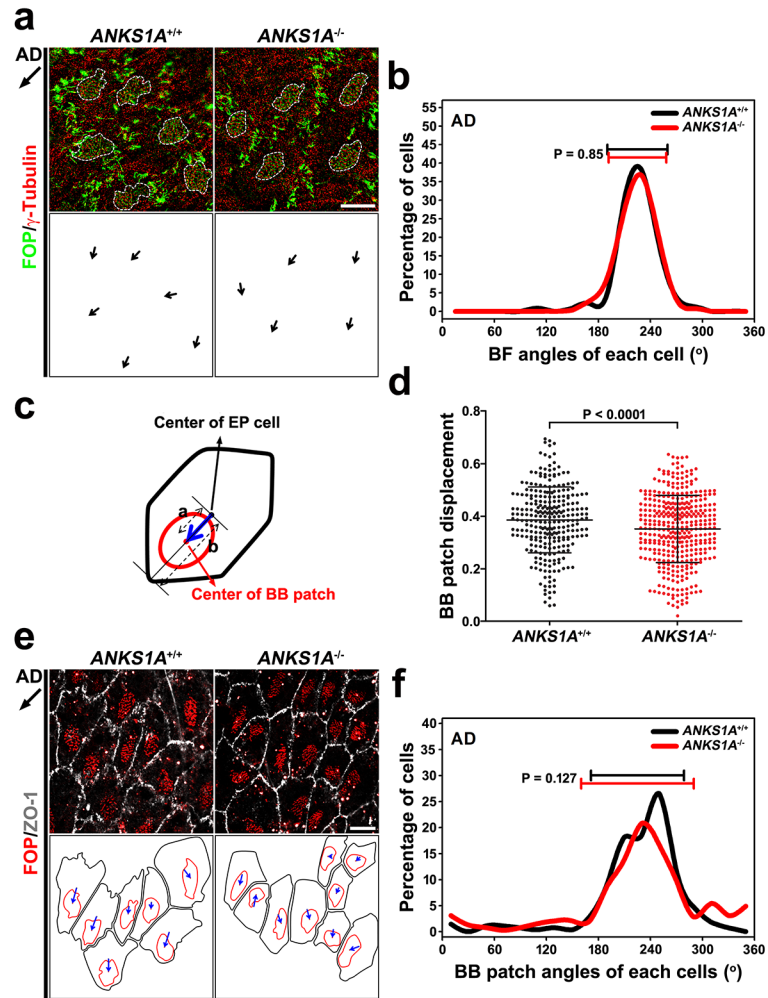

**Supplementary Figure 3.** (a) Each BB cluster is outlined with a dotted line. Black arrows indicate the average BF angle in each cell. (b) Histogram showing the distribution of the average angle of the vectors shown in panel a. Error bars on the graph represent CSD. (c) Schematic showing BB patch vector angle (marked by a blue arrow) and BB patch displacement (measured as a/b). (d) BB patch displacement was slightly but significantly affected in *ANKS1A* KO mice. The data represent means  $\pm$  SD. Each point on the graph is the BB patch displacement of an individual E1 cell. *ANKS1A*<sup>+/+</sup> set, n = 275 cells from 3 mice; *ANKS1A*<sup>-/-</sup>, n = 389 cells from 3 mice. (e) Immunohistochemical staining of ZO-1 (white) and FOP (red) on mouse LWs (top panels). ZO-1 delineates the cell boundaries (outlined in black), while FOP marks the BB patches (outlined in red) on the apical surface. Blue arrows in the bottom panels were drawn from the center of each cell to the cell's BB patch. Scale bar for a and e, 10  $\mu$ m. (f) Histogram showing the distribution of BB patch angles in *ANKS1A* WT and KO samples. Error bars on the graph represent CSD. *ANKS1A*<sup>+/+</sup> set, n = 275 cells from 3 mice; *ANKS1A*<sup>-/-</sup>, n = 389 cells from 3 mice.



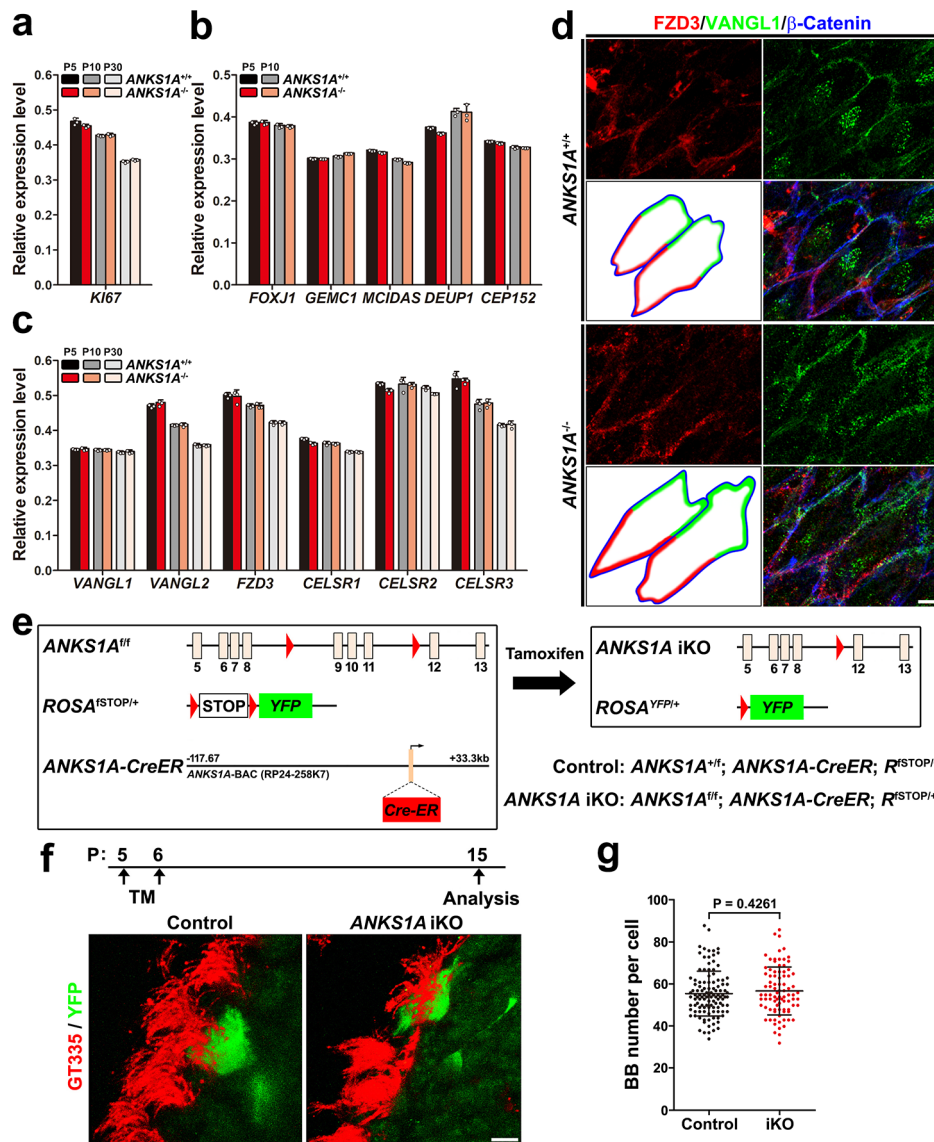

**Supplementary Figure 4.** (a-c) qRT-PCR analysis using total RNAs extracted from the LWs at the indicated postnatal stages. (d) Asymmetric localization of VANGL1 and FZD3 in ependymal cells. We found that antibodies against FZD3 or VANGL1 among various PCP proteins were effective for the LW histochemical staining. Note that the polarized distribution of FZD3 or VANGL1 proteins was not disturbed by *ANKS1A* deficiency (3 mice for each group). Scale bar, 5  $\mu$ m. (e) Strategy in which *ANKS1A*-targeted cells were genetically labeled with a reporter (YFP) through induction of Cre recombinase activity. The floxed *ANKS1A* allele contained two loxP sites flanking three exons of *ANKS1A*, whereas the floxed *ROSA* allele contained two loxP sites flanking the *STOP* sequence. An *ANKS1A* BAC transgenic line expressing *Cre-ER* was used to excise the floxed sequences in response to tamoxifen (TM) only in cells where *ANKS1A* is expressed. (f) TM was injected twice in total (on days P5 and P6). Then, the targeted E1 cells in the LW were analyzed at P15. The sections were stained with GT335 to visualize both targeted and non-targeted E1 cells. Scale bar, 5  $\mu$ m. (g) The number of BBs was measured essentially as described in Supplementary Figure 2c. Control set, n = 113 cells from 2 mice; *ANKS1A* iKO, n = 87 cells from 2 mice.

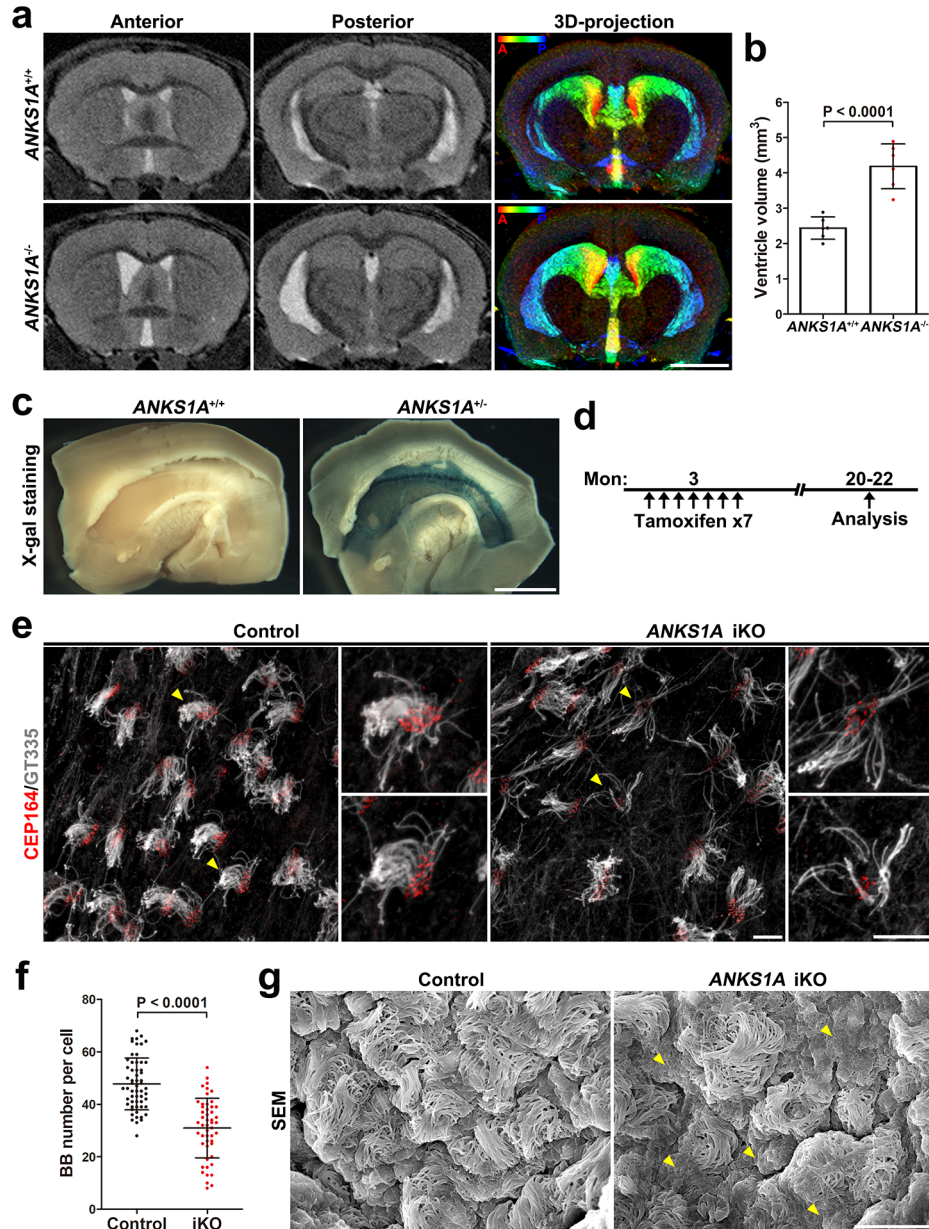

**Supplementary Figure 5.** (a) Brain ventricles were visualized using  $\mu$ MRI. Ventricles appeared bright on T2-weighted  $\mu$ MRI mouse brain images are shown in gray scale and color LUT display. Color-coded images display brain ventricles with anterior-posterior (A-P) direction. Red colors represent an anterior region of the brain ventricle, while blue colors represent a posterior region. Twenty consecutive coronal images were merged into a single picture for each brain (see supplementary Movie 4). Scale bar, 50  $\mu$ m. (b) Ventricular volume in each brain was quantified using the Fiji image analysis package. *ANKS1A*<sup>+/+</sup> set, n = 6 mice; *ANKS1A*<sup>-/-</sup>, n = 6 mice. (c) LWs with other forebrain tissues were isolated from WT or *ANKS1A*<sup>+/lacZ</sup> mice at three months of age and subjected to X-gal staining for 15 hours. Scale bar, 500  $\mu$ m. (d) TM was injected once every day for a total of 7 consecutive days from mice at 3 months of age and the LWs from aged mice were isolated. (e) The LWs were stained with GT335 and CEP164 to visualize multi-cilia and BBs, respectively. Scale bar, 10  $\mu$ m. (f) The number of BBs was measured essentially as described in Supplementary Figure 2f. Control set, n = 58 cells from 3 mice; *ANKS1A* iKO, n = 50 cells from 3 mice. (g) SEM analysis of LWs from littermates at 20 months of age (3 mice from each group). The yellow arrowheads mark the endypmal cells lacking multi-cilia. Scale bar, 10  $\mu$ m.



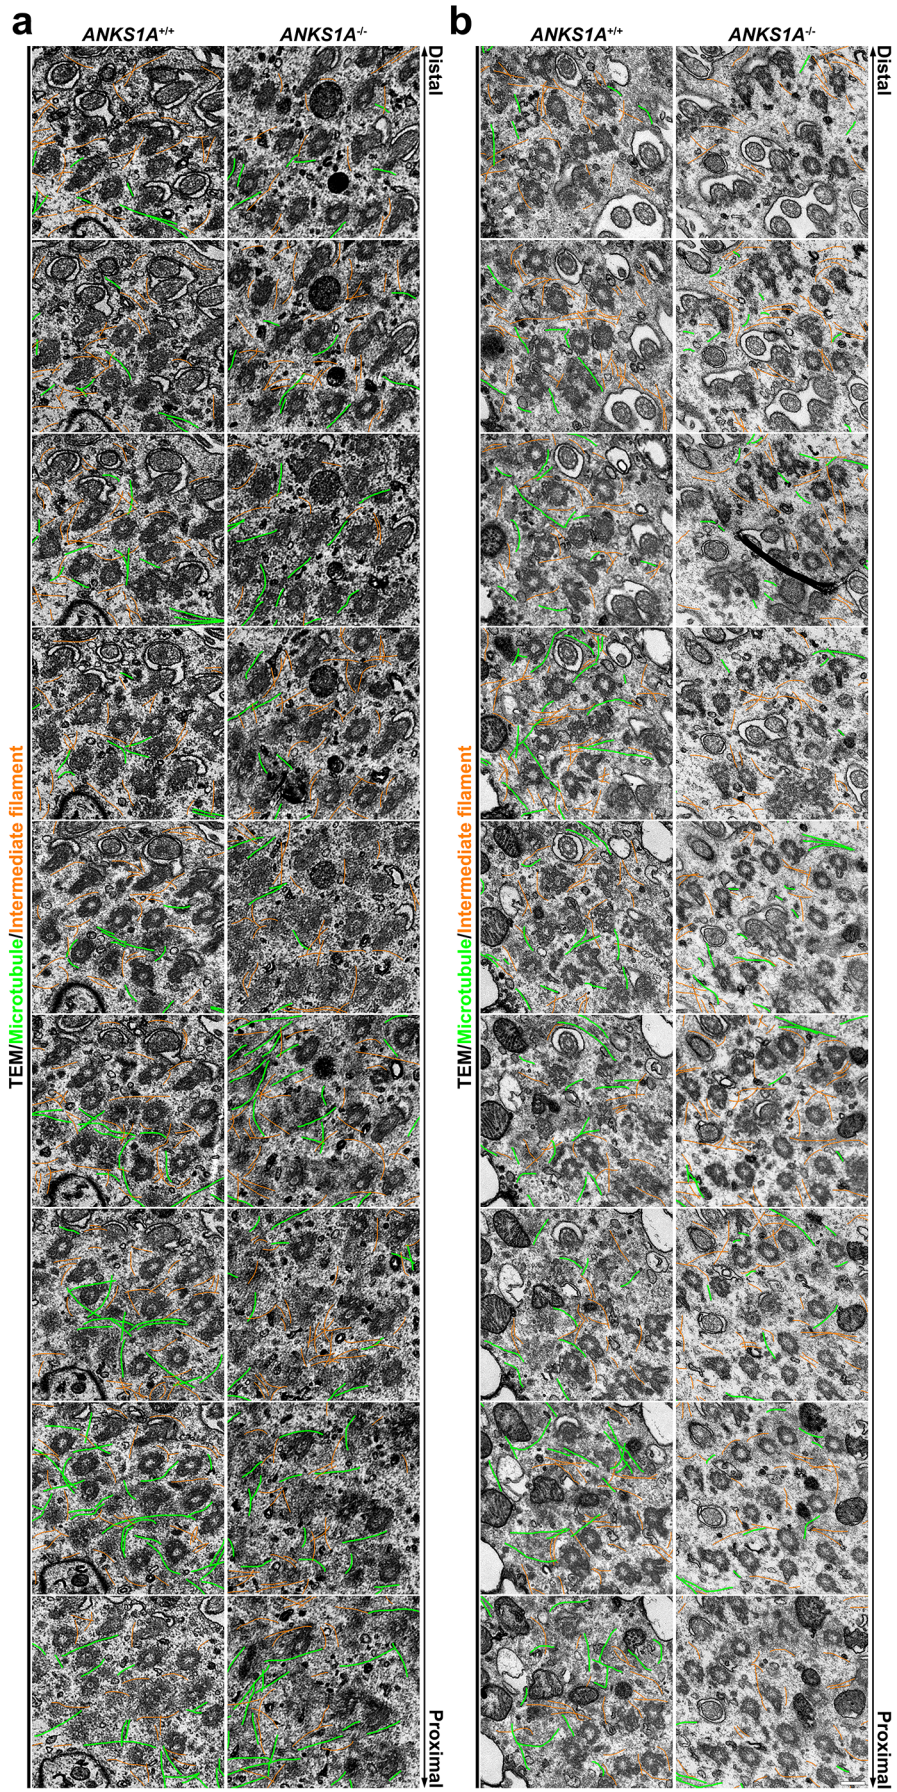



**Supplementary Figure 6.** (a and b) A ribbon of consecutive sections (50 nm) was placed on a one-hole grid and subsequently analyzed by TEM. The three-dimensional organization of microtubules or intermediate filaments was examined 450 nm region beneath the initial portion of BF. Each image was enlarged up to 5X to visualize and draw the cytoskeletal networks and then each image was imported into the Zeiss Zen Blue software to reconstruct a 3D-image as shown in Fig. 7 and Movie 5. Scale bar, 500 nm.

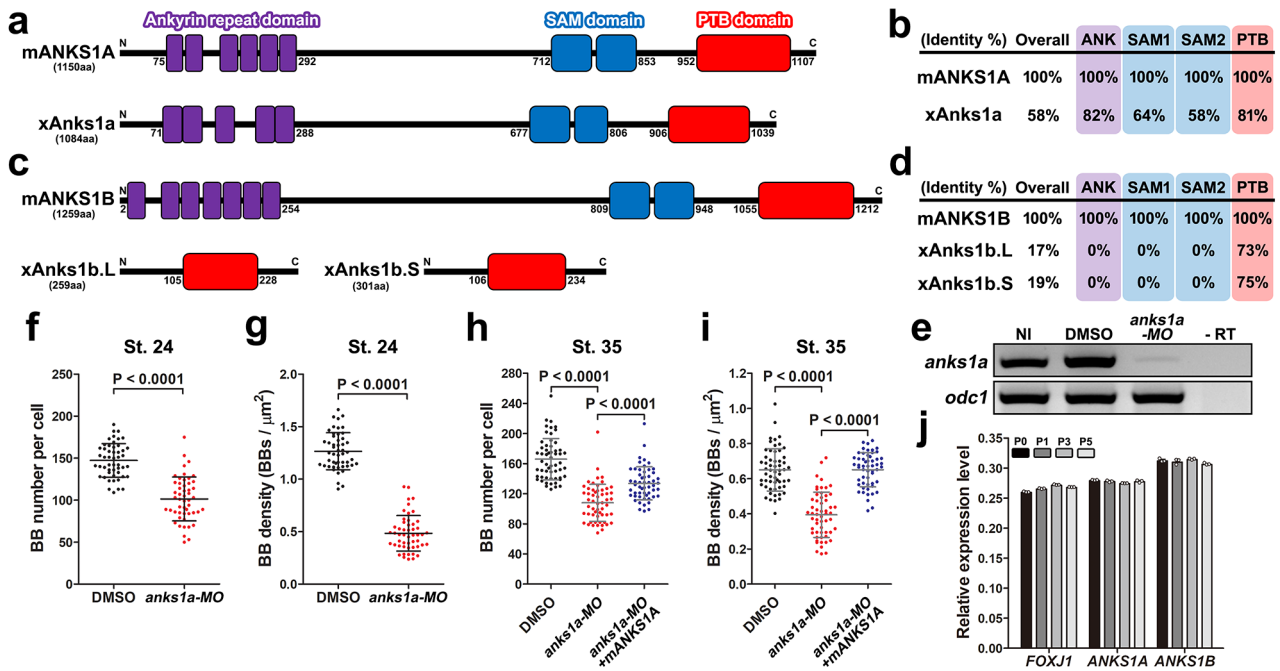

**Supplementary Figure 7.** (a-d) Schematic depicting the mouse and *Xenopus anks1* family gene homologues. A comparison of the amino acid sequences of the full-length proteins is shown with their conserved motifs. Note that the ankyrin repeats and PTB domain of ANKS1A are highly conserved with 82% and 81% identity, respectively. In contrast, the ankyrin repeats and SAM domains of mouse ANKS1B are not found in *Xenopus Anks1B*. The accession numbers of the genes used for these alignments were P59672 (mANKS1A), Q6IRM7 (*x anks1a*), Q8BIZ1 (mANKS1B), A0A1L8GWL7 (*xanks1b.L*) and A0A1L8GQZ5 (*xanks1b.S*). (e) RT-PCR analysis of *Xenopus anks1a* expression in animal cap explants isolated from embryos injected with DMSO or *anks1a*-MO. NI, not injected; *odc1*, ornithine decarboxylase 1. (f-i) Epidermis from *Xenopus* embryos at stage 24 or 35 was stained with anti-FOP antibodies and analyzed by 3DSIM analysis as described in Supplementary Figure 2c. For embryos at stage 24 (f & g), DMSO-injection, n = 50 cells from 3 embryos; *anks1a*-MO injection, n = 51 cells from 3 embryos. For embryos at stage 35 (h & i), DMSO-injection, n = 57 cells from 5 embryos; *anks1a*-MO injection, n = 56 cells from 5 embryos; *anks1a*-MO injection plus mouse ANKS1A-VN RNA injection, n = 54 cells from 3 embryos. (j) qRT-PCR analysis using total RNAs extracted from the LWs of mouse pups at the indicated postnatal stages. Note that both ANKS1A and ANKS1B are expressed in ependymal cells.
